# Supplementary material for: Improvement of blue, white and NIR emissions in YPO4:Dy3+ nanoparticles on co-doping of Li+ ions
Source: Royal Society of Chemistry journal article supplement (doi:10.1039/c2dt32062b), 2012-01-01
Supplement: c2dt32062b.pdf [file c2dt32062b.pdf]

## Electronic supplementary information (ESI)

### Improvement of Blue, White and NIR emissions in $\text{YPO}_4:\text{Dy}^{3+}$ nanoparticles on co-doping of $\text{Li}^+$ ions

A. K. Parchur,<sup>a</sup> A. I. Prasad,<sup>b</sup> S. B. Rai<sup>a</sup> and R. S. Ningthoujam<sup>b\*</sup>

<sup>a</sup>*Department of Physics, Banaras Hindu University, Varanasi-221005, India*

<sup>b</sup>*Chemistry Division, Bhabha Atomic Research Centre, Mumbai-400085, India*

*This paper is dedicated to Professor N. S. Gajbhiye on the occasion of his 60<sup>th</sup> birthday*

Corresponding Author

Phone:+91-22-2559321 and Fax: +91-22-25505151, E-mail: rsn@barc.gov.in (R. S. Ningthoujam)

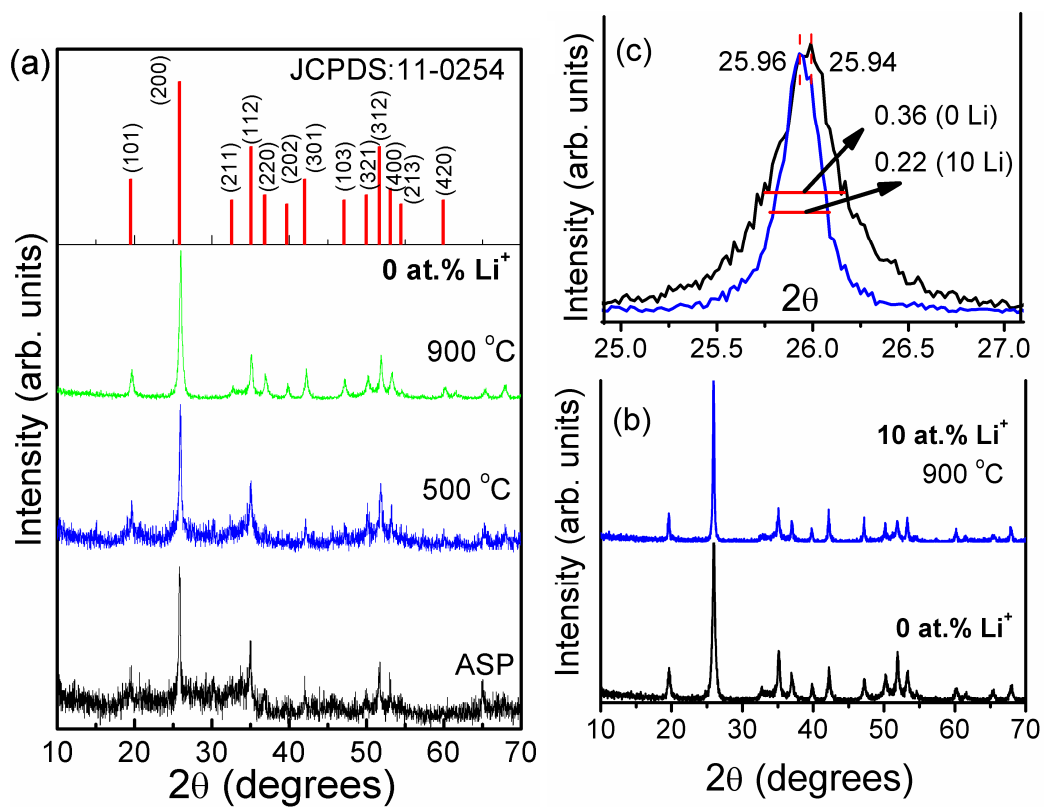

**Figure S1.** (a) XRD patterns of as-prepared, 500 and 900 °C annealed samples of YPO<sub>4</sub>:2Dy; (b) 900 °C annealed samples without and with Li<sup>+</sup> (10 at.%) and their comparison of (200) plane (c).

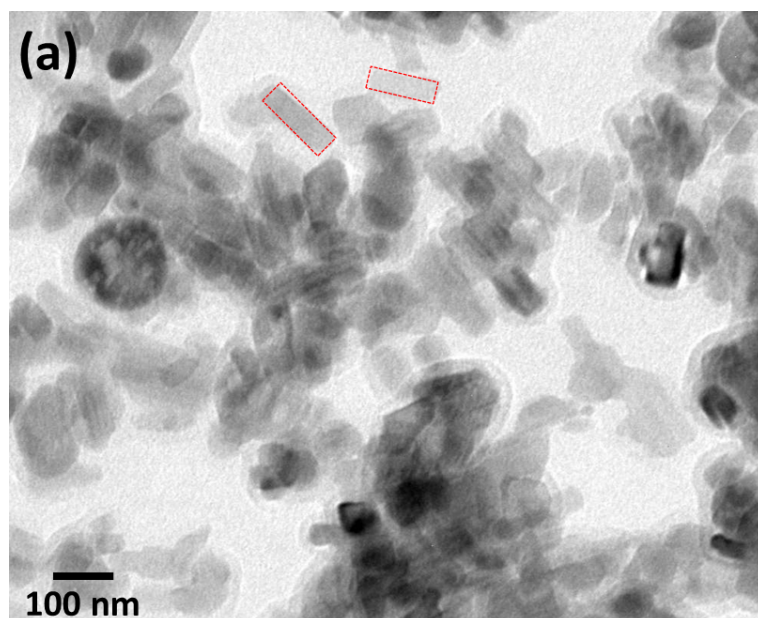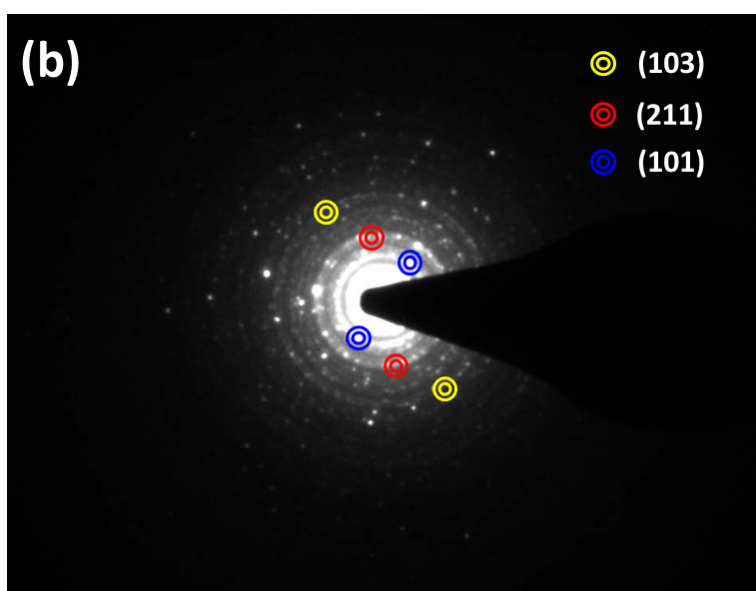

**Figure S2.** (a) TEM image having average particle size 40 nm in width and 110 nm in length and (b) SAED pattern of YPO<sub>4</sub>:2Dy.

### Stark splitting in visible and NIR regions

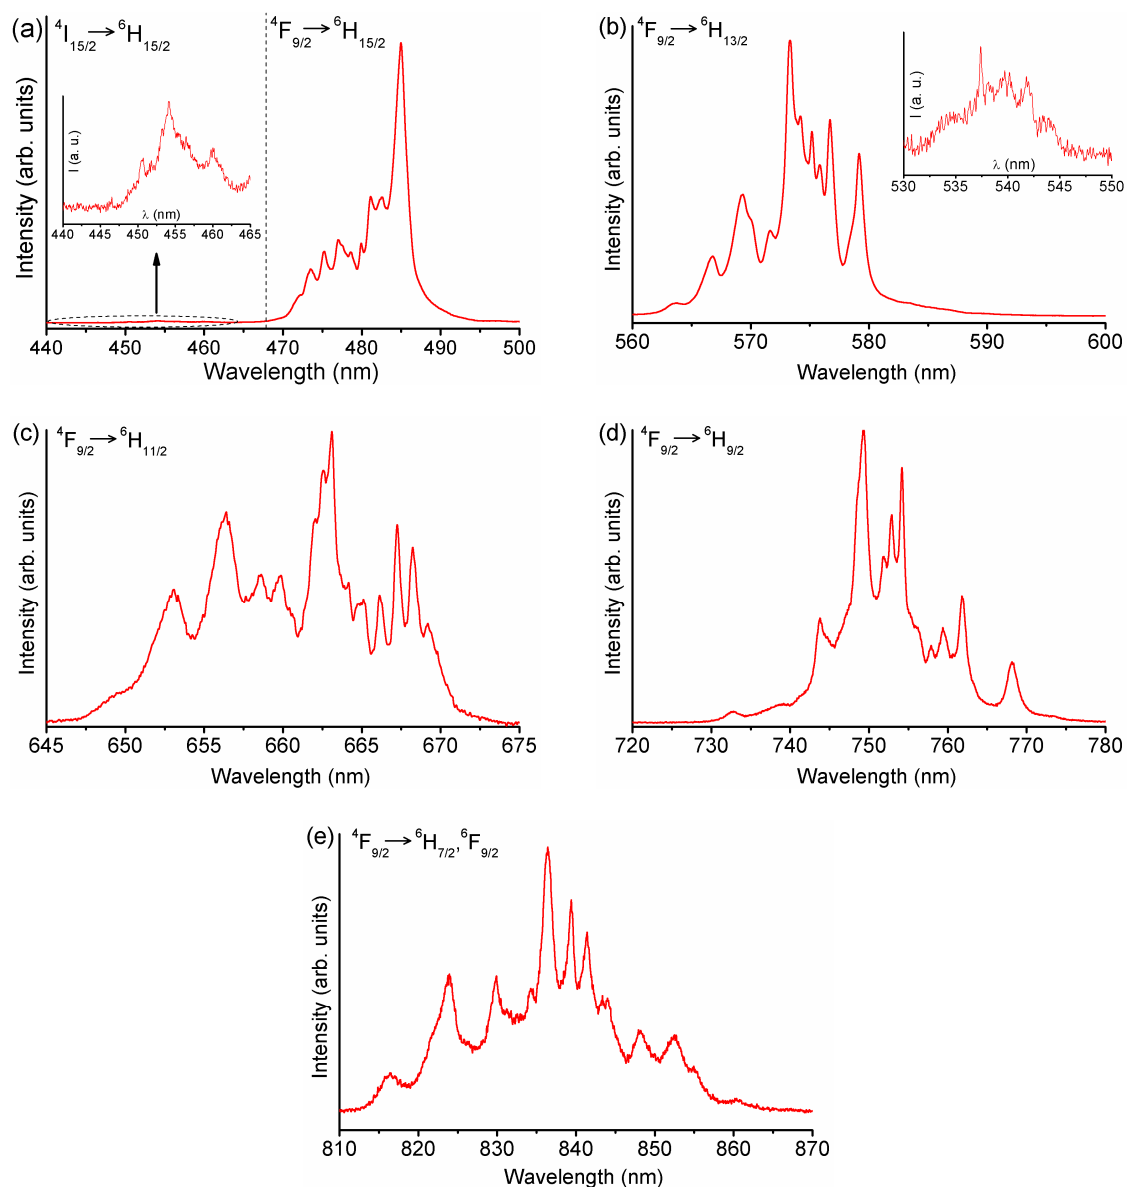

**Figure S3.** (a-e) Expanded photoluminescence emission spectrum from the 900 °C annealed 7 at.% Li<sup>+</sup> co-doped YPO<sub>4</sub>:2Dy nanoparticles under 355 nm laser excitation. The peaks show clear Stark splitting of Dy<sup>3+</sup> transitions.
